# Supplementary material
Source: PubMed Central journal article supplement (PMC3280904)
Supplement: cbt-12-888-s01.pdf [file cbt-12-888-s01.pdf]

**Fig. S1**

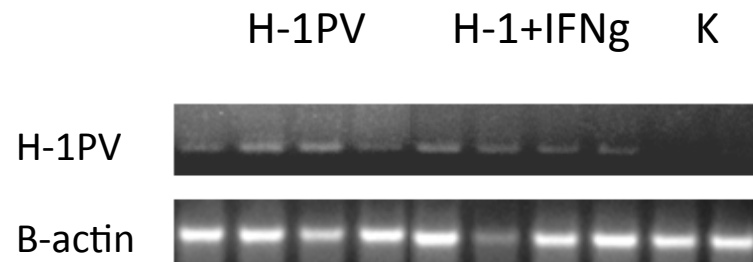

**Fig. S1 RT-PCR levels of viral DNA or unspliced mRNA in metastatic nodules.**

Two groups of metastasis bearing rats were treated with two intraperitoneal injections of H-1PV spanning four weeks between them, with or without intermediate reIFNg i.p. inoculation. Two rats per group were sacrificed at 3 days after the second virus injection. Bands represent PCR products from two different metastasis samples from each animal. Beta-actin expression served as standard control.

**Fig. S2**

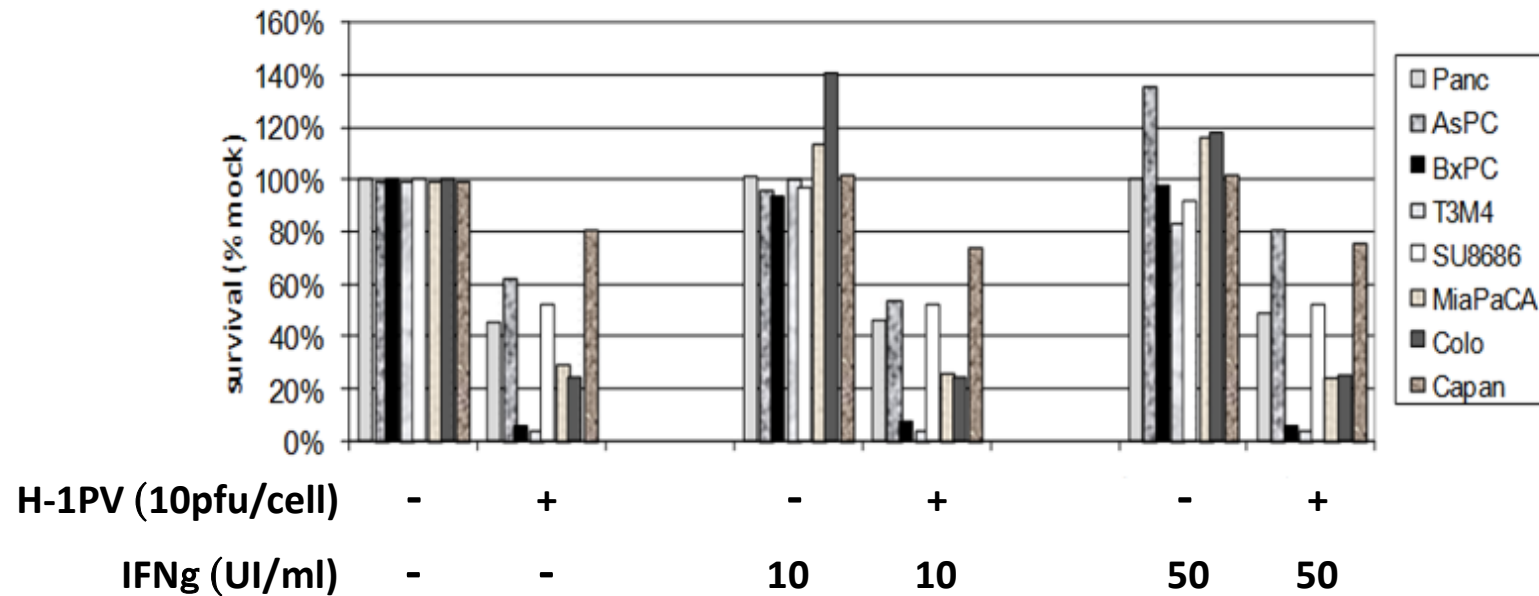

**Figure.S2 Effects of H-1PV+IFNγ combination on PDAC cell survival**

The indicated human PDAC cell lines were seeded in 96 well plates at  $2 \times 10^3$  cells/well and treated with H-1PV at an MOI of 10 pfu/cell combined with increasing concentrations of IFNγ (10, 50 UI/ml). 72 hrs later an MTT assay was performed. The values are expressed as the percentage of surviving cells from mock treated cultures.
